# Supplementary material for: β-Cyclodextrin-Encapsulated Rhodamine Derivatives Core–Shell Microspheres—Based Fluorescent Sensor for Au3+ and Template for Generating Microplates of Gold
Source: MDPI journal article supplement (doi:10.3390/mi14071443), 2023-07-18
Supplement: s1 [file s1]

## Supplementary Information

# $\beta$ -Cyclodextrin-Encapsulated Rhodamine Derivatives Core–Shell Microspheres—Based Fluorescent Sensor for Au<sup>3+</sup> and Template for Generating Microplates of Gold

Maniyazagan Munisamy <sup>1,2,†</sup>, Balamurugan Rathinam <sup>3,†</sup>, Esakkimuthu Shanmugasundaram <sup>1</sup>, Vigneshkumar Ganesan <sup>1</sup>, Vimalasruthi Narayanan <sup>1</sup> and Suganya Bharathi Balakrishnan <sup>1</sup>, Selvam Kaliyamoorthy <sup>4,\*</sup> and Stalin Thambusamy <sup>1,\*</sup>

<sup>1</sup> Department of Industrial Chemistry, School of Chemical Sciences, Alagappa University, Karaikudi 630003, India; manichemist@gmail.com (M.M.); asmuthu92@gmail.com (E.S.); gvkumar.chemist@gmail.com (V.G.); annamsruthi2014@gmail.com (V.N.); sbsuganyaa@gmail.com (S.B.B.)

<sup>2</sup> Department of Nanotechnology and Advanced Materials Engineering, Sejong University, Seoul 05006, Republic of Korea

<sup>3</sup> Department of Chemical and Materials Engineering, National Yunlin University of Science and Technology, Yunlin 64002, Taiwan; balar@yuntech.edu.tw

<sup>4</sup> Department of Chemistry for Materials, Graduate School of Engineering, Mie University, Tsu 514-8507, Japan

\* Correspondence: chemsel@gmail.com (S.K.); stalin.t@alagappauniversity.ac.in (S.T.)

† These authors contributed equally to this work.

**Citation:** Munisamy, M.; Rathinam, B.; Shanmugasundaram, E.; Ganesan, V.; Narayanan, V.; Balakrishnan, S.B.; Kaliyamoorthy, S.; Thambusamy, S.

$\beta$ -Cyclodextrin-Encapsulated Rhodamine Derivatives Core–Shell Microspheres—Based Fluorescent Sensor for Au<sup>3+</sup> and Template for Generating Microplates of Gold. *Micromachines* **2023**, *14*, 1443. <https://doi.org/10.3390/mi14071443>

Academic Editor: Wing-Cheung (Roy) Law

Received: 7 June 2023

Revised: 12 July 2023

Accepted: 14 July 2023

Published: 18 July 2023

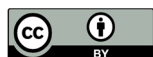

**Copyright:** © 2023 by the authors. Licensee MDPI, Basel, Switzerland. This article is an open access article distributed under the terms and conditions of the Creative Commons Attribution (CC BY) license (<https://creativecommons.org/licenses/by/4.0/>).

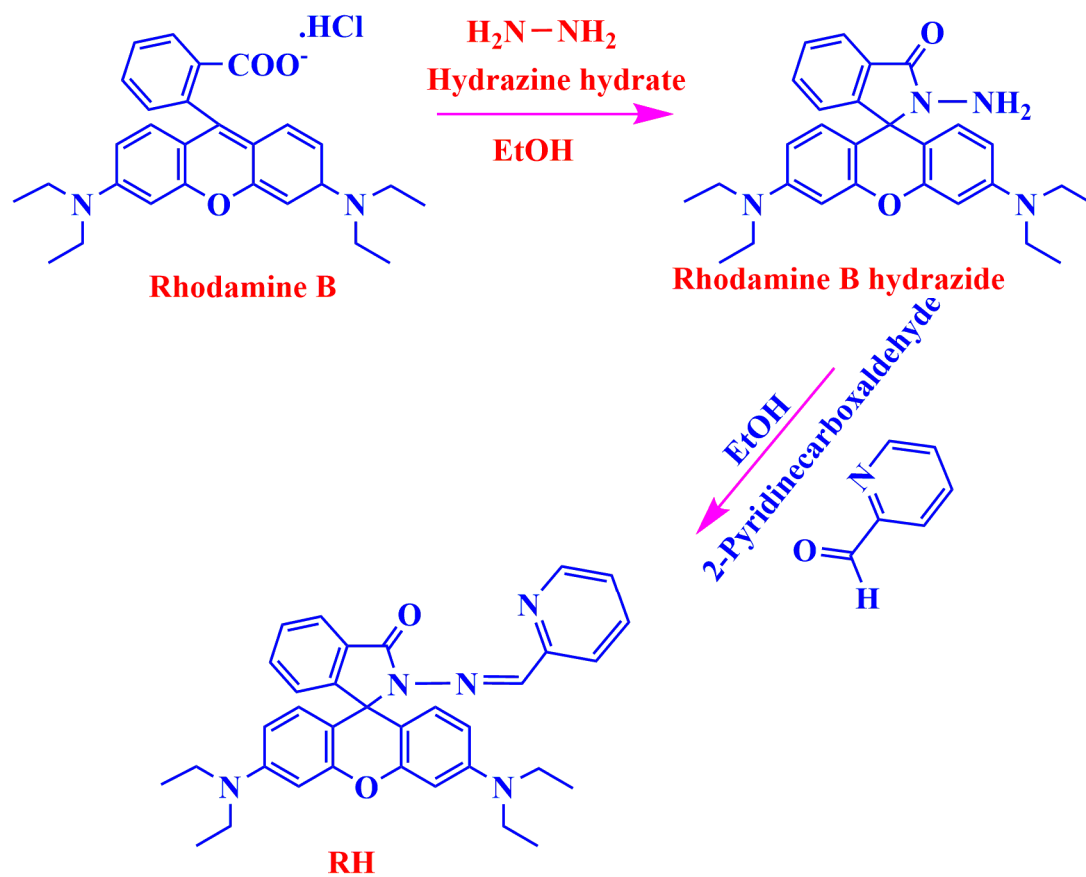

**Scheme S1.** Synthetic scheme for fluorescent probe RH.

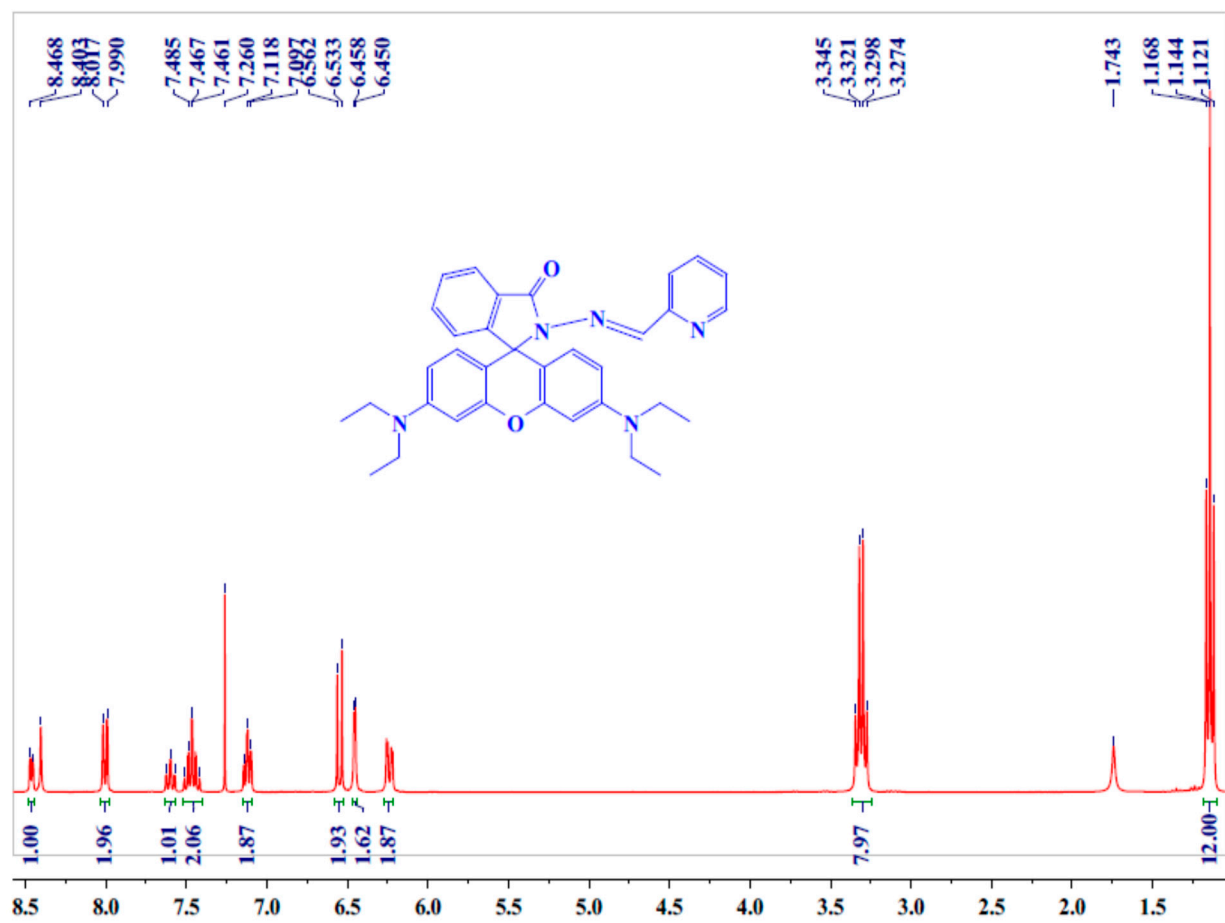

Figure S1.  $^1\text{H}$  NMR ( $\text{CDCl}_3$ ) of RH.

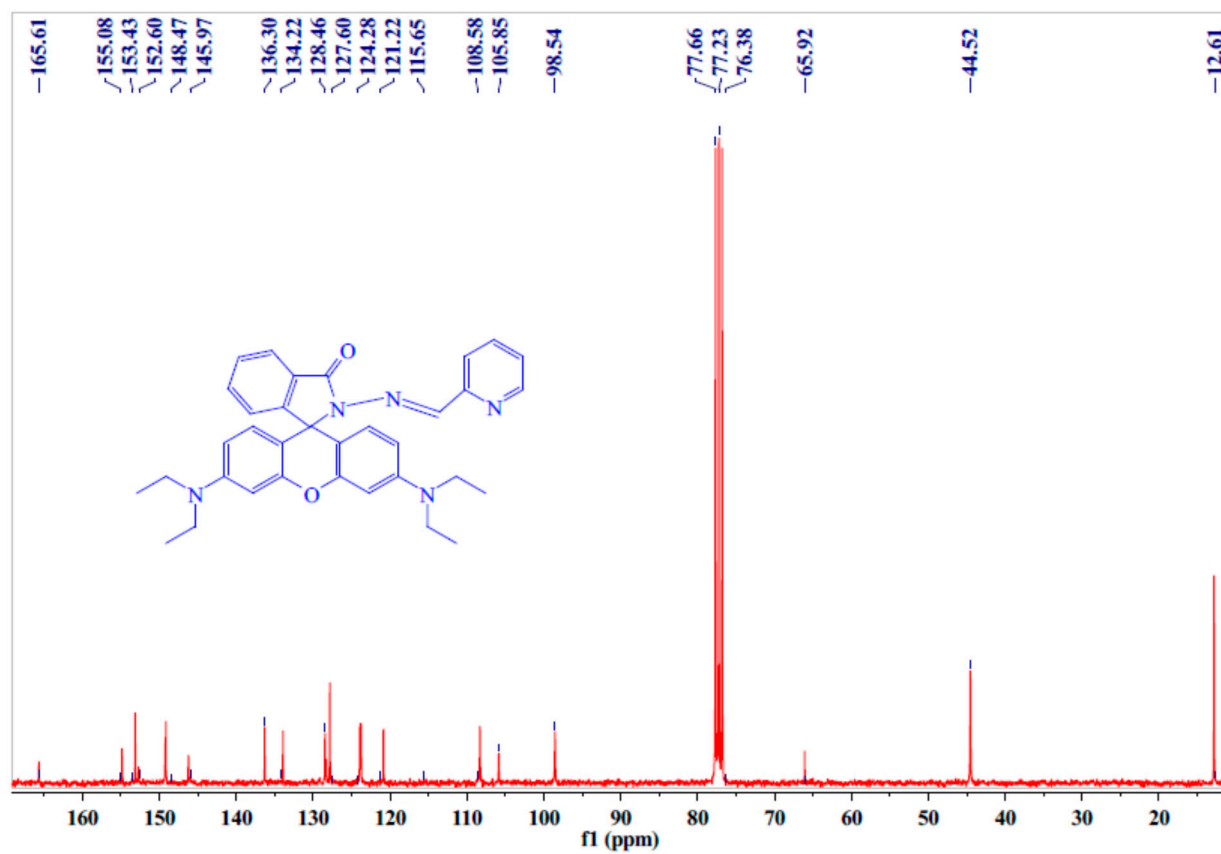

**Figure S2.**  $^{13}\text{C}$  NMR of RH( $\text{CDCl}_3$ ).

1: (Time: 0.38) Center (Top, 4, Ar); Smooth (Mn, 2x0.75); Subtract (1,40.00 ,0.010); Combine (16:20-(9:10+26:27))

1:MS ES+  
7.3e+007

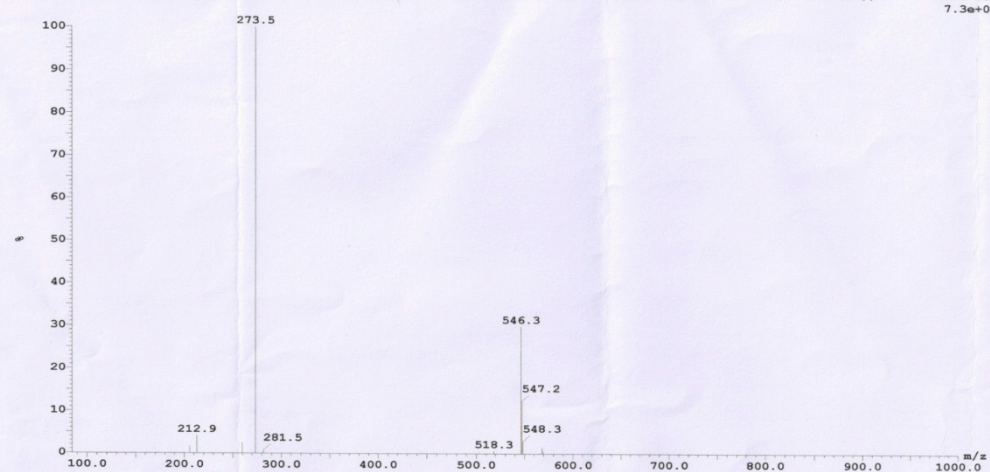

**Figure S3.** The ESI mass spectra of RH.

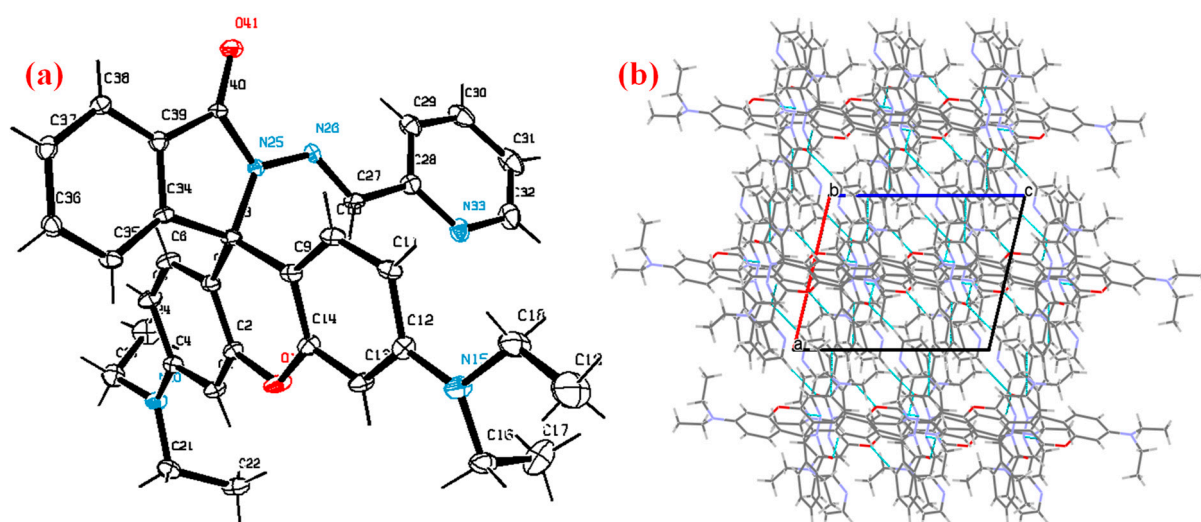

**Figure S4.** (a) X-ray crystal structure of RH showing displacement ellipsoids drawn at the 30% probability level. Hydrogen atoms have been omitted for clarity. (b) The crystal packing of RH. Intermolecular interactions have been omitted for clarity.

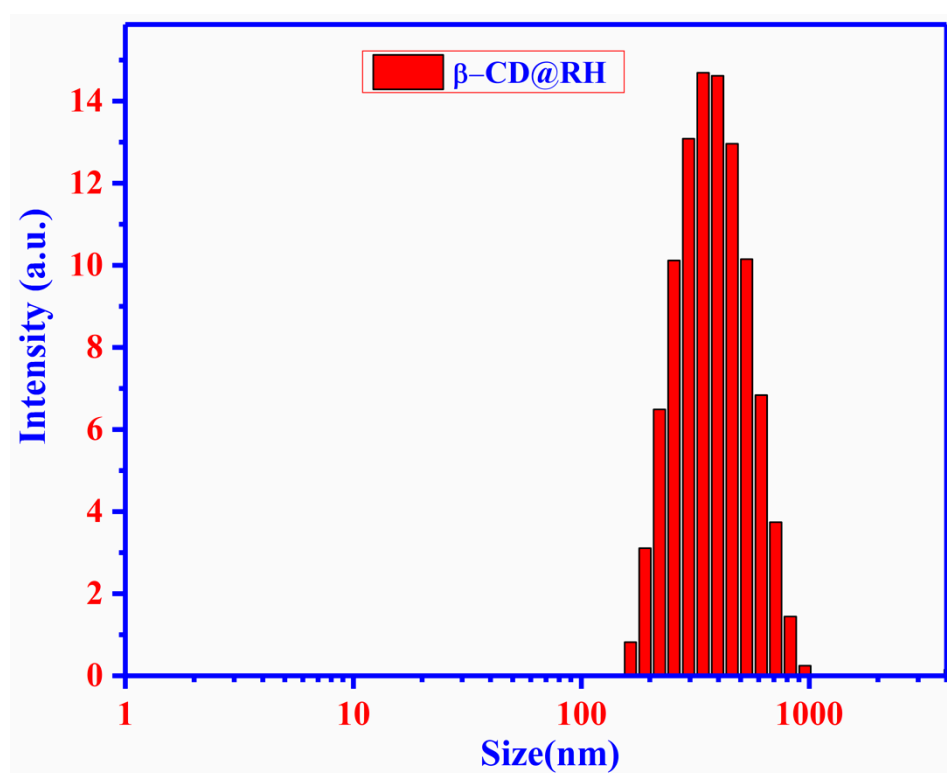

**Figure S5.** Dynamic laser scattering of  $\beta$ -CD@RH microspheres.

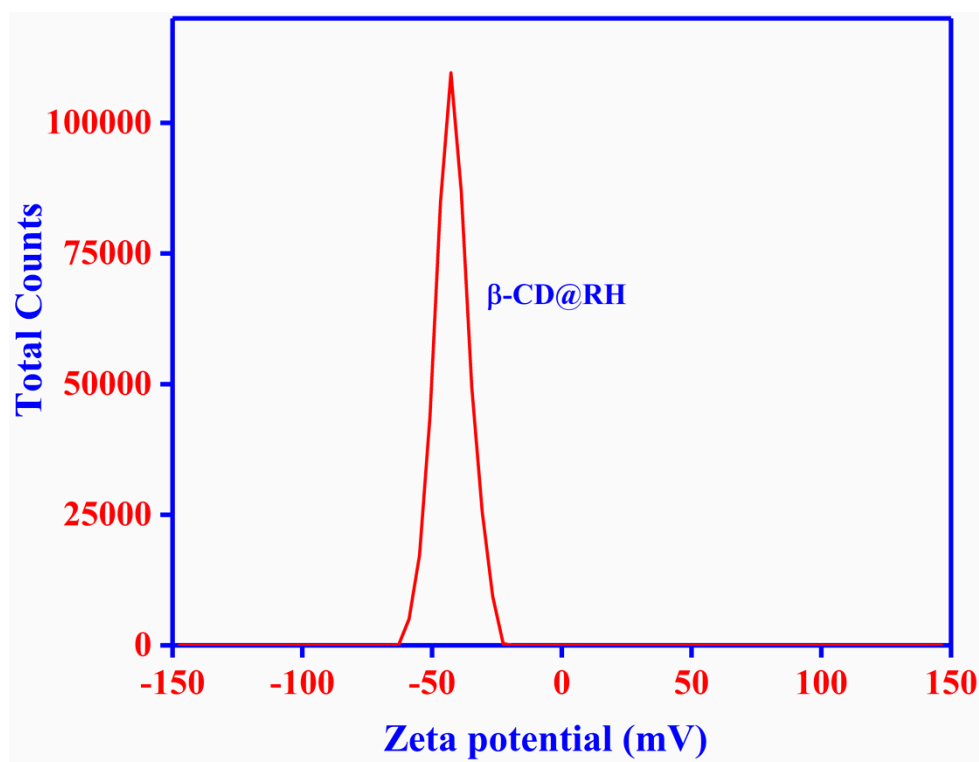

**Figure S6.** Zeta potential of  $\beta$ -CD@RH microspheres.



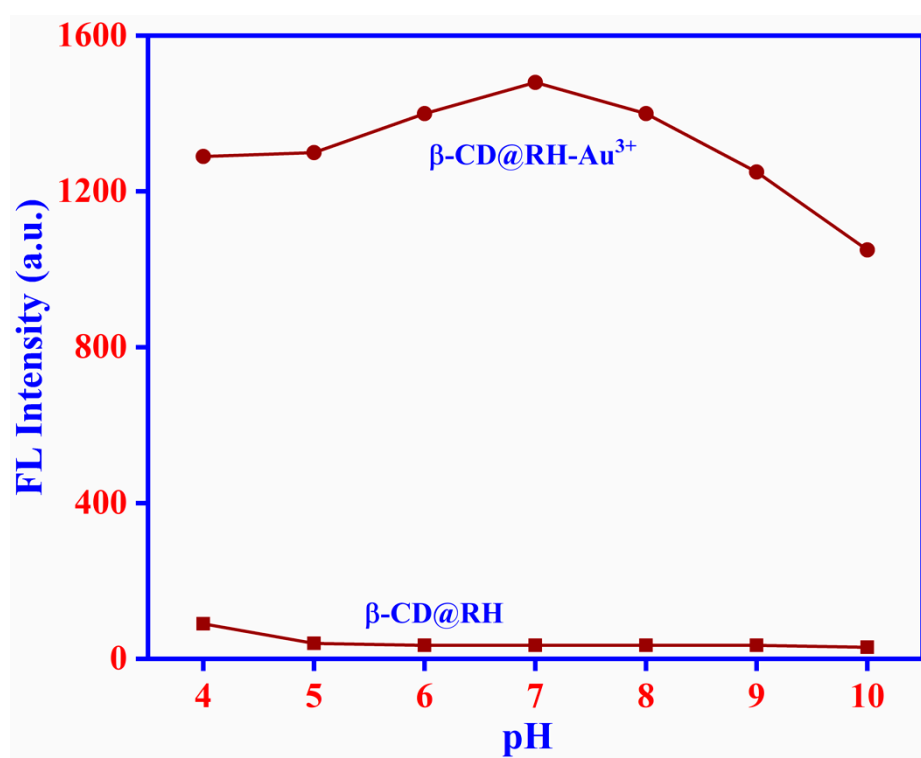

**Figure S7.** Fluorescence response of  $\beta$ -CD@RH in absence and in presence of  $\text{Au}^{3+}$  ions in water media at different pH ( $\lambda_{\text{em}} = 582 \text{ nm}$ ).

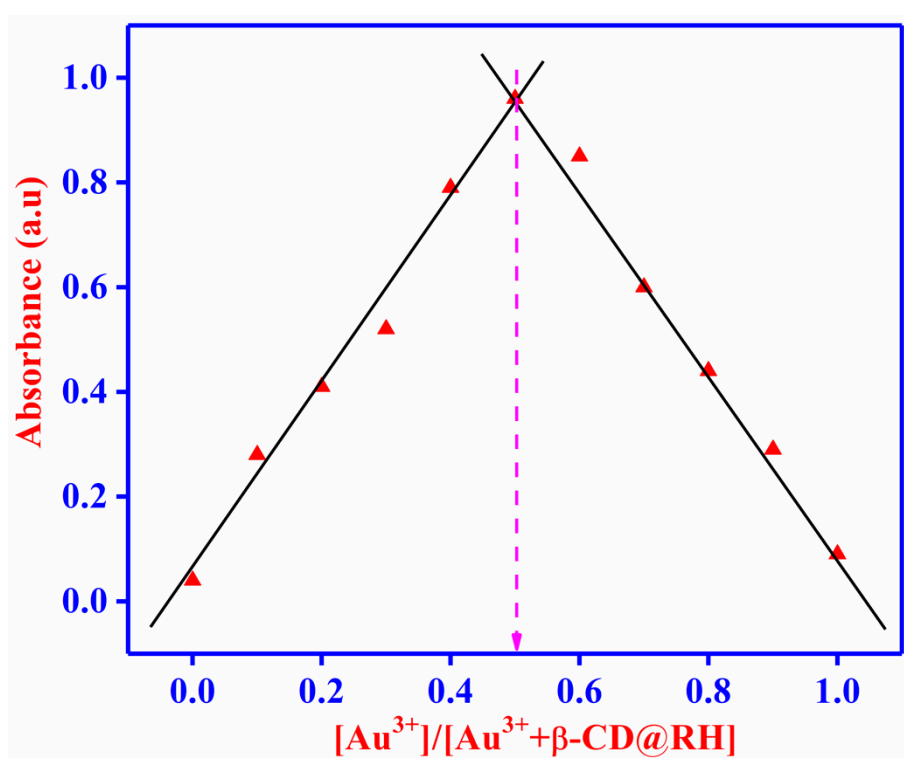

**Figure S8.** Job's plot from the absorption data for stoichiometry determination between  $\beta\text{-CD@RH}$  and  $Au^{3+}$  ions in water at 25 °C at  $\lambda_{\text{abs}} = 556 \text{ nm}$ .

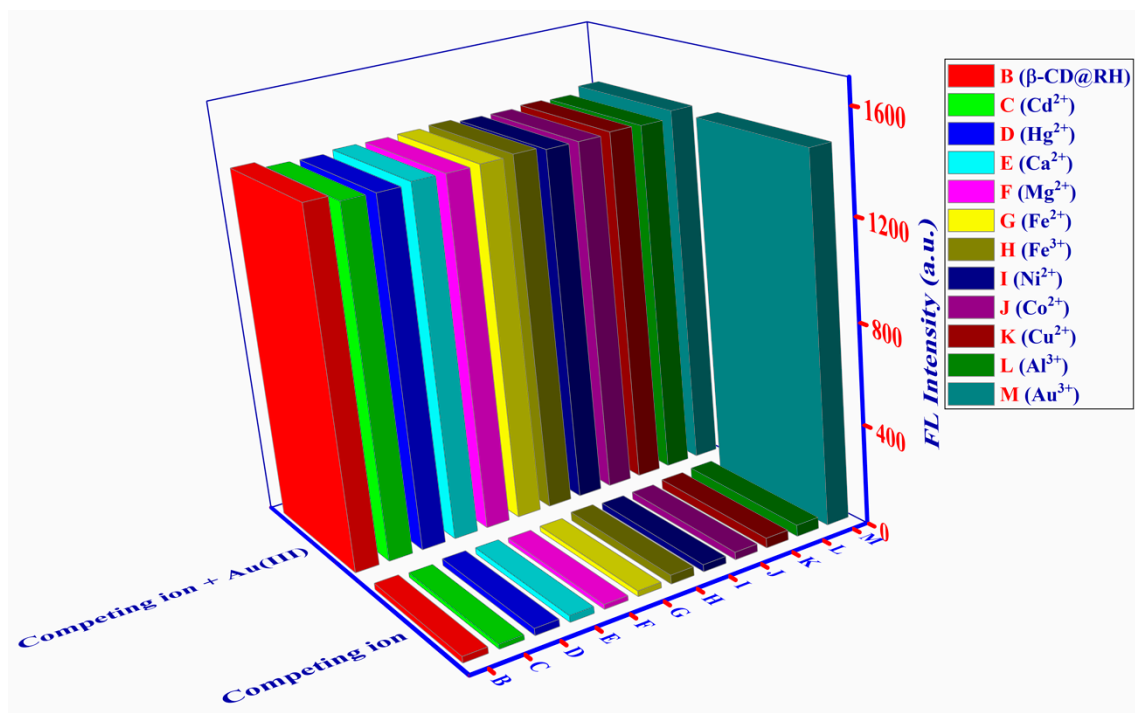

**Figure S9.** Results of the competition experiments between  $\text{Au}^{3+}$  and selected metal ions. The free  $\beta\text{-CD@RH}$  concentration was set at  $10\ \mu\text{M}$ , and the excitation was at  $556\ \text{nm}$  with a slit width of  $5.0\ \text{nm}$ .

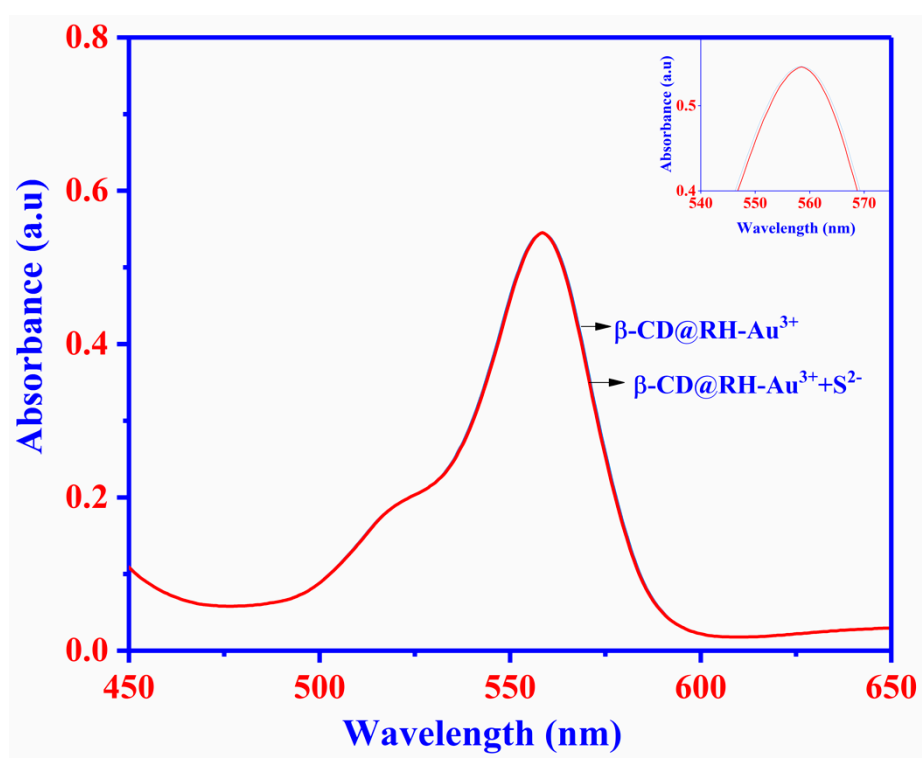

**Figure S10.** UV-vis titration spectra of  $\beta\text{-CD@RH}$  (10  $\mu\text{M}$ ) with 5 equiv. of  $\text{Au}^{3+}$  upon addition of sodium sulfide (30  $\mu\text{M}$ ) in water.

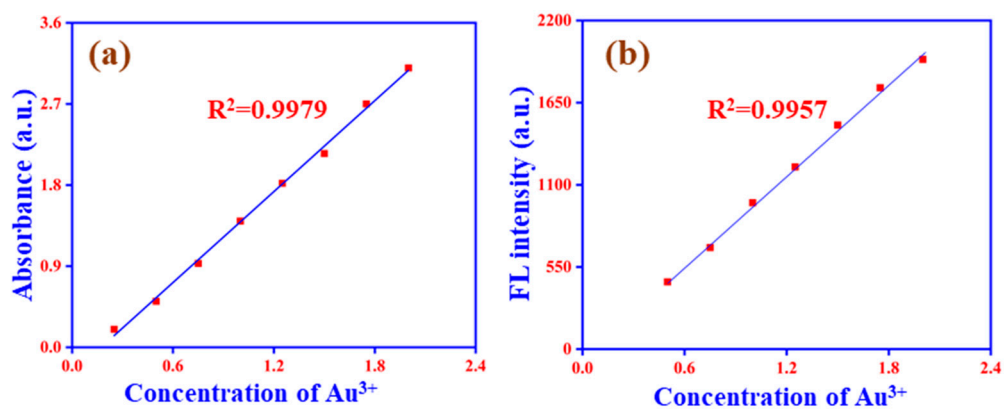

**Figure S11.** (a) Concentration variation of Absorbance intensity Vs. Concentration of  $\text{Al}^{3+}$  (0 to 2 equiv.). (b) Concentration variation of FL intensity Vs. Concentration of  $\text{Al}^{3+}$  (0 to 2 equiv.).

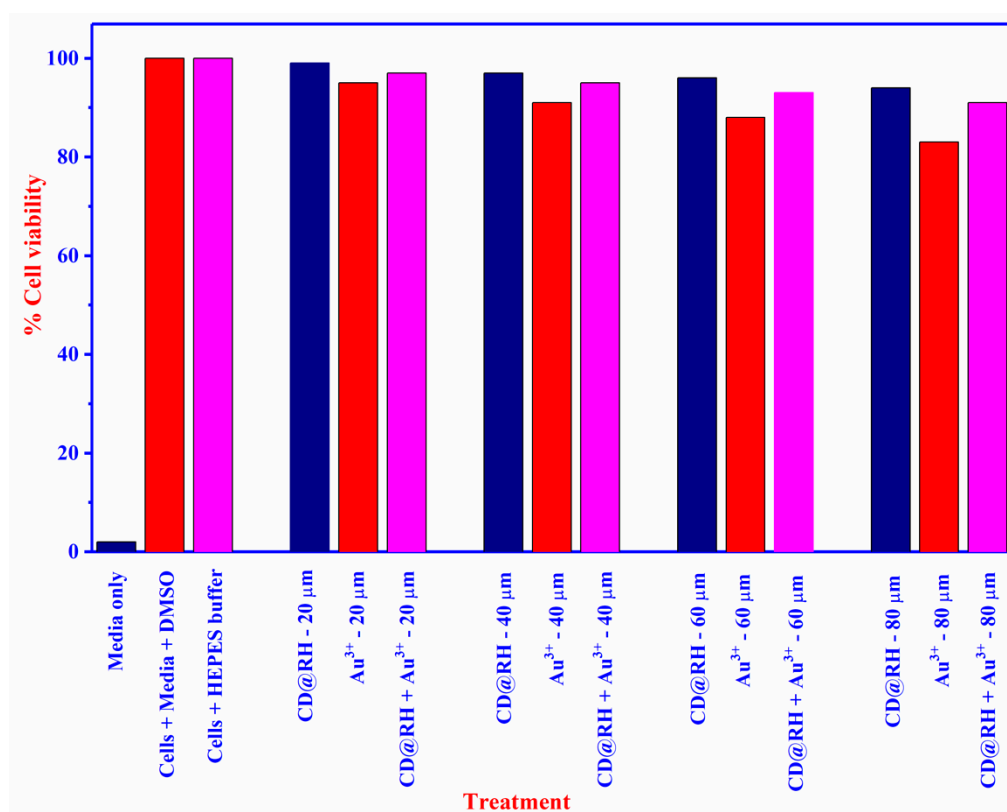

**Figure S12.** Cytotoxic effect of  $\beta$ -CD@RH,  $\text{Au}^{3+}$  and  $\beta$ -CD@RH- $\text{Au}^{3+}$  in Mesenchymal Stem Cells (MSCs) incubated for 6 h by MTT assay. Results are expressed as mean of three independent experiments.

**Table S1.** Crystal data and details of refinements for **RH**

| <b>RH</b>                   |                                                               |
|-----------------------------|---------------------------------------------------------------|
| Empirical Formula           | C <sub>34</sub> H <sub>35</sub> N <sub>5</sub> O <sub>2</sub> |
| Formula Weight              | 545.67                                                        |
| CCDC No                     | 1440773                                                       |
| Crystal System              | Monoclinic                                                    |
| Space group                 | P2 <sub>1</sub> /c                                            |
| a(Å)                        | 9.3925 (3)                                                    |
| b (Å)                       | 25.6728 (10)                                                  |
| c(Å)                        | 12.0364 (4)                                                   |
| β (°)                       | 103.692 (2)                                                   |
| Density(mg/m <sup>3</sup> ) | 1.285                                                         |
| Volume(Å <sup>3</sup> )     | 2819.88 (17)                                                  |
| Temperature,K               | 296                                                           |
| Z                           | 4                                                             |
| F(000)                      | 1160                                                          |
| Θ range (deg)               | 4.2 to 64.4                                                   |
| Collected reflections       | 14441                                                         |
| Independent reflections     | 4549                                                          |
| Goodness-of-fit             | 1.07                                                          |
| R1[I>2.0σ(I)]               | 0.074                                                         |
| wR1[I >2.0σ(I)]             | 0.247                                                         |
